# Supplementary material
Source: PubMed Central journal article supplement (PMC2224172)

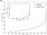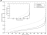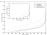

Supplement: pnas_0707684105_1.pdf [file pnas_0707684105_1.pdf]

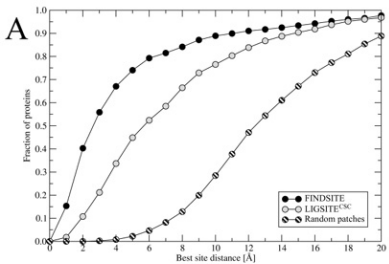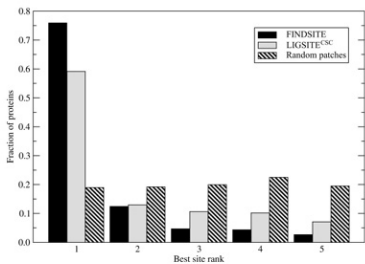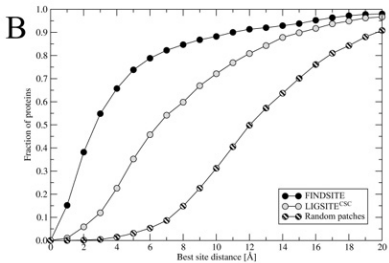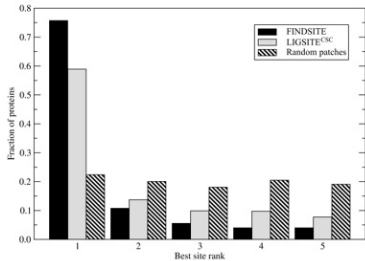

Supplement: pnas_0707684105_2.pdf [file pnas_0707684105_2.pdf]

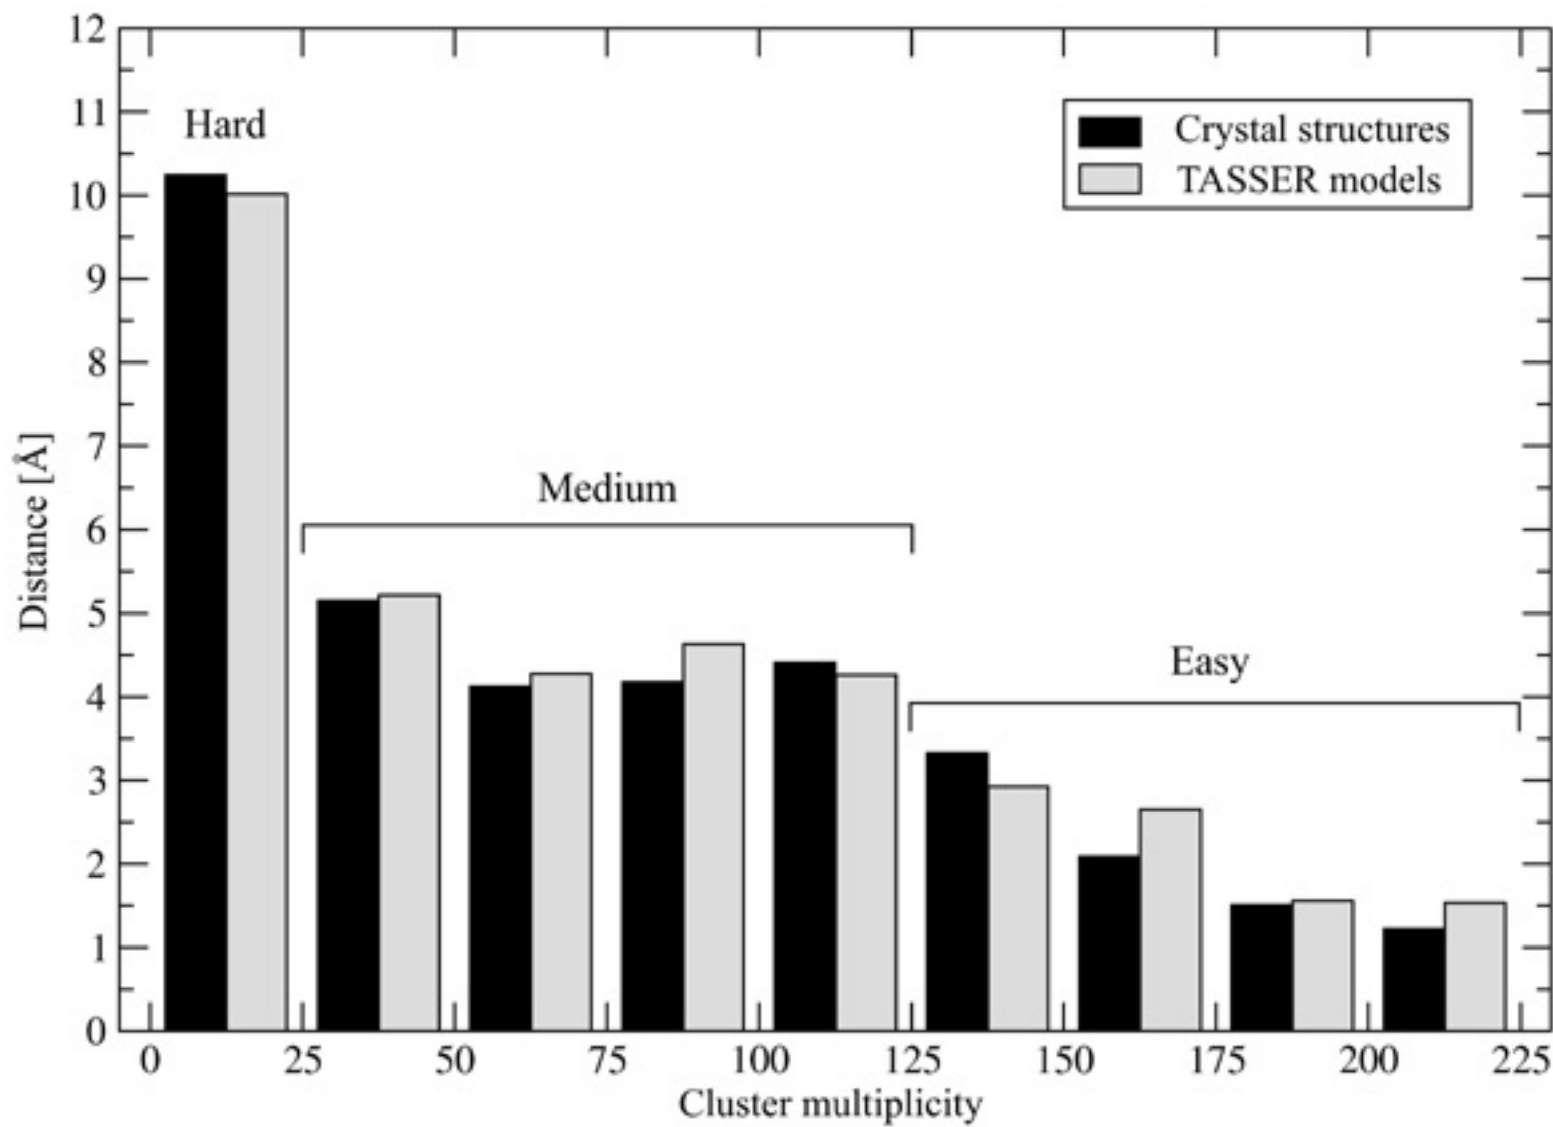

Supplement: pnas_0707684105_3.pdf [file pnas_0707684105_3.pdf]

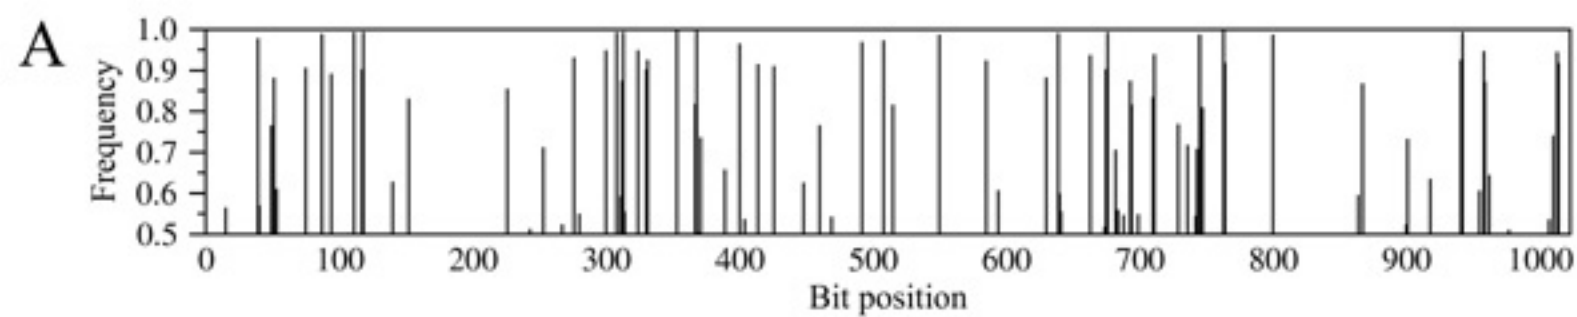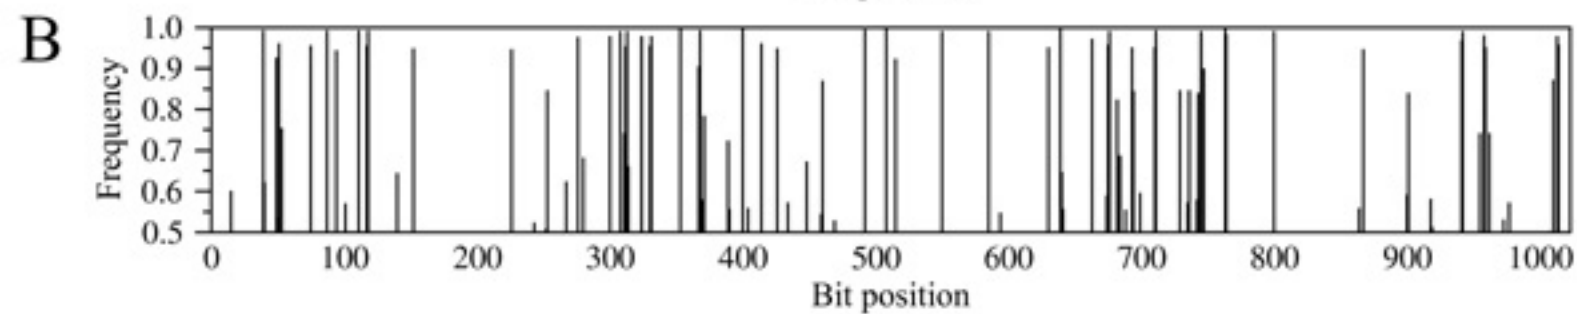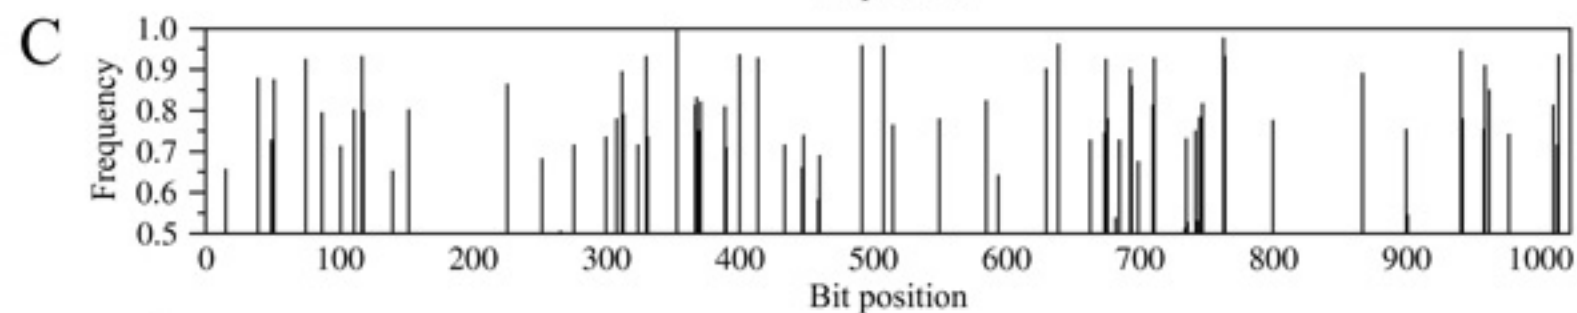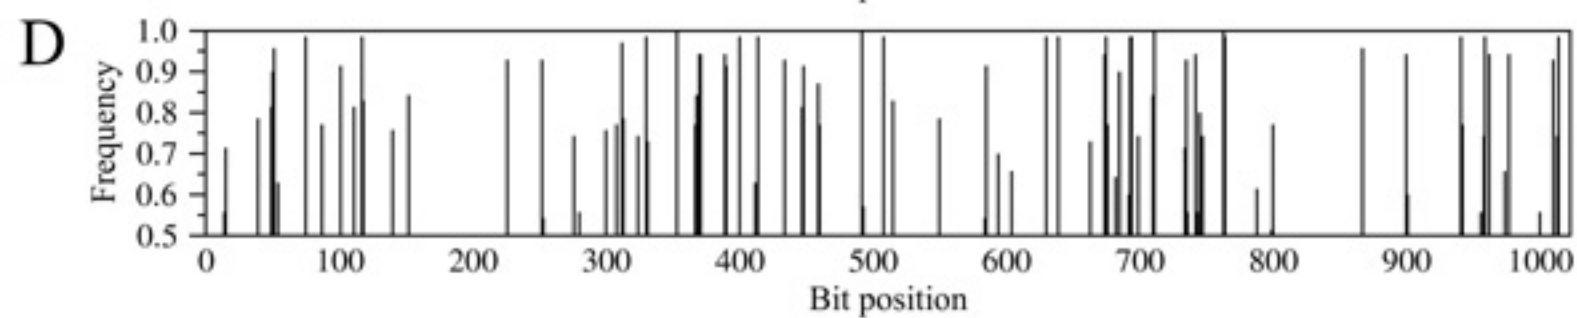

Supplement: pnas_0707684105_4.pdf [file pnas_0707684105_4.pdf]

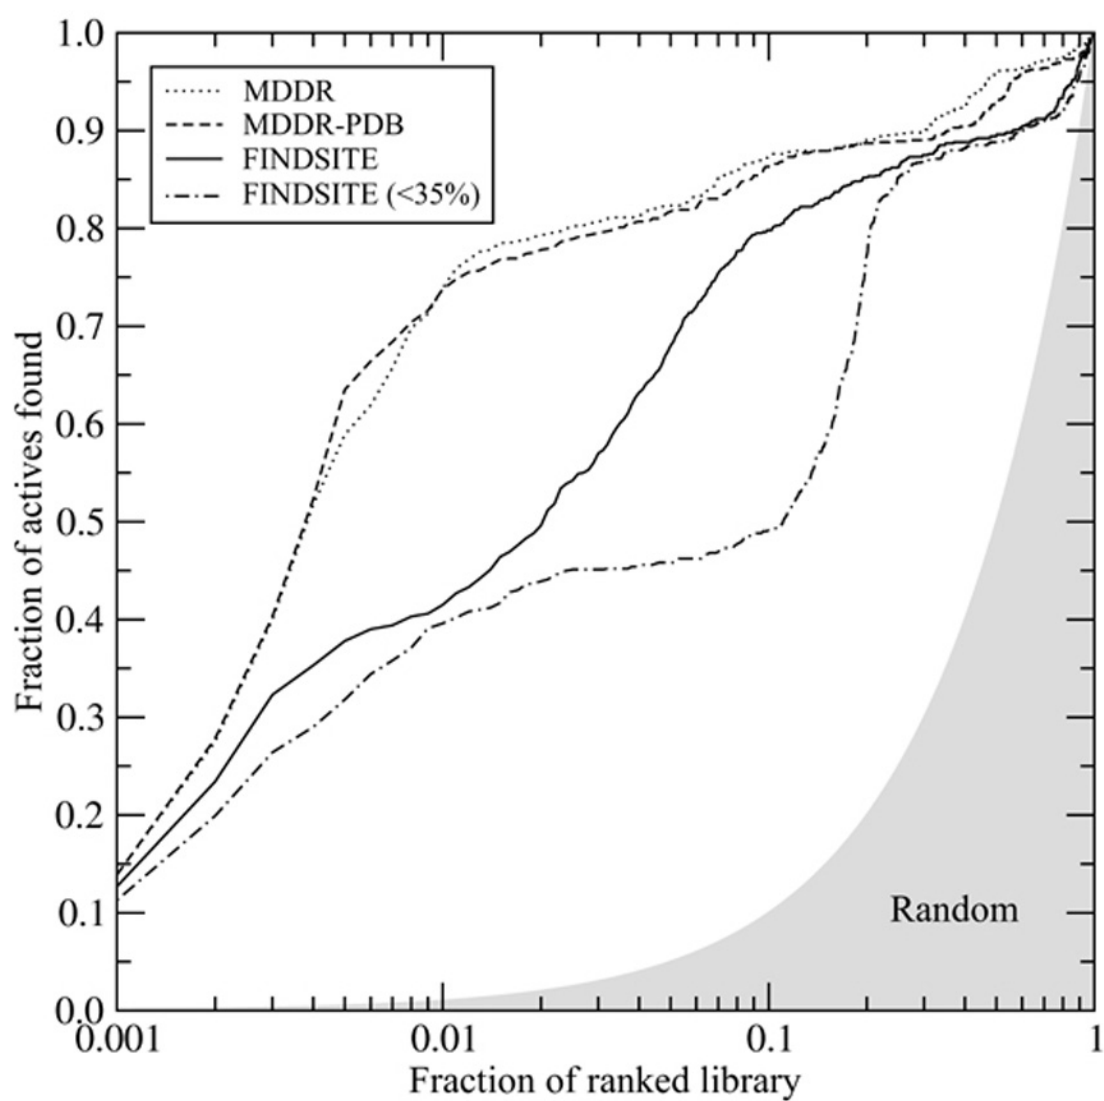

Supplement: pnas_0707684105_5.pdf [file pnas_0707684105_5.pdf]
